# Supplementary material
Source: publisher figshare collection journal article supplement (https://karger.figshare.com/ndownloader/files/15202943)
Supplement: Supplementary file 1 [file 15202943]

**Figure S1: Course of Self-Efficacy from Treatment Admission to 5-year Follow-up for the Abstinent and the Drinking Group.**

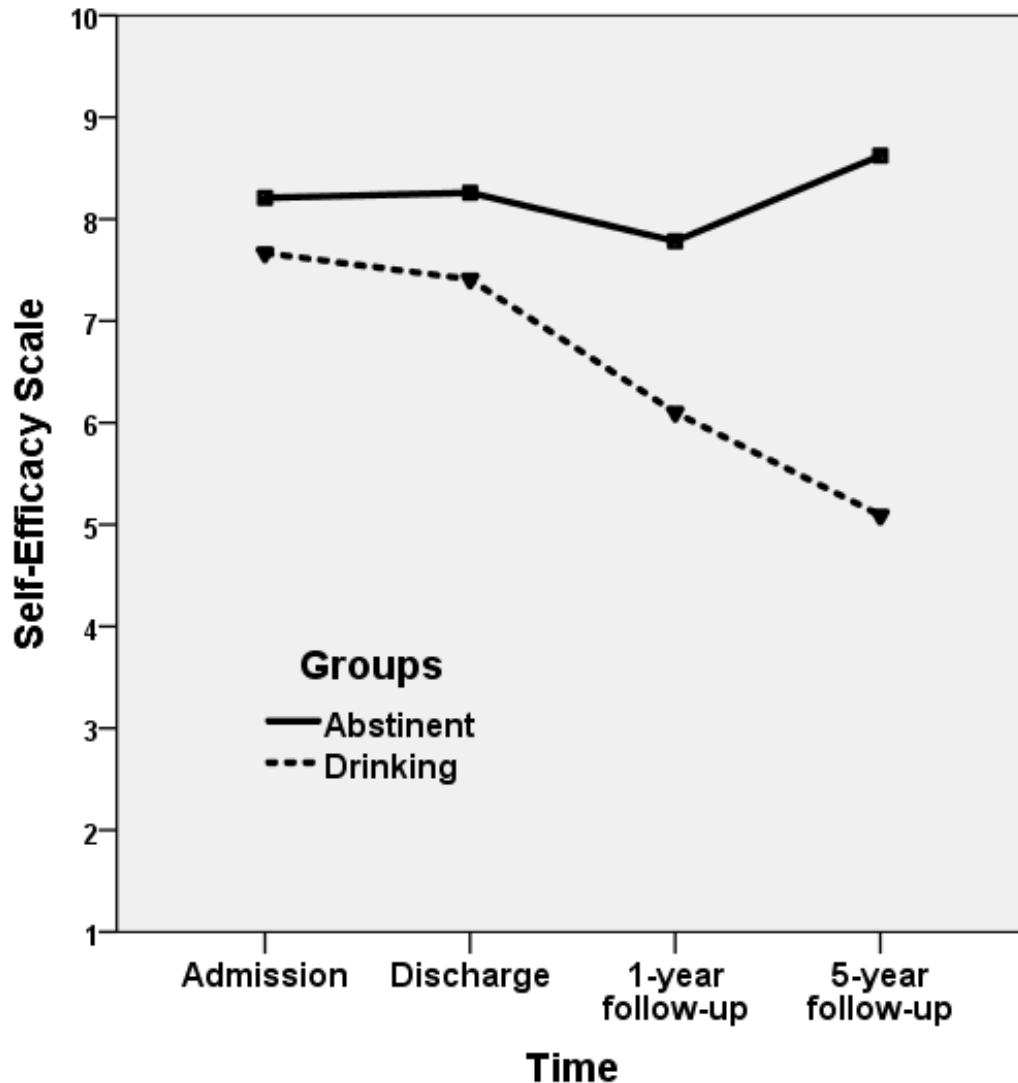

**Legend:** Self-efficacy was measured by asking patients “How confident are you that you will be completely abstinent in one year?” Answers could range from 1= not confident at all to 10 = extremely confident. The analysis of variance for repeated measures revealed a significant time x group interaction effect ( $F_{3,217} = 16.54, p < .001$ ), indicating that self-efficacy changes differently over time depending on drinking status at 5-year follow-up (abstinent vs. drinking group). The abstinent group shows an increase while the drinking group shows a decrease in self-efficacy.
